# Supplementary material for: Efficacy and accuracy of the transillumination-guided gastric tube placement in neonates
Source: Research Square preprint supplement (doi:10.21203/rs.3.rs-7463340/v1), 2025-09-04
Supplement: Supplementary file 1 [file 5a9b0bcb2bc5e2c7571fc191.docx]

**Supplemental Figure Legends**

**Supplemental Figure 1. Study flowchart**

Flowchart showing the number of patients (*n*) and gastric tube placement procedures (*p*) among enrolled neonates and pediatric patients. Only neonatal cases were analyzed in this study.

Abbreviation: GSD Ib, glycogen storage disease type Ib.

**Supplemental Figure 2. Bland–Altman plot comparing placement errors between Tumguide® and NEMU or WBF**

Placement error (defined as insertion length minus final adjusted length) was significantly smaller using the Tumguide® method in Phase 2 compared to the NEMU (A) and WBF (B) methods.

Abbreviations: NEMU, nose–earlobe–mid-umbilicus; WBF, weight-based formula.
