# Supplementary material for: Efficacy and accuracy of the transillumination-guided gastric tube placement in neonates
Source: Research Square preprint supplement (doi:10.21203/rs.3.rs-7463340/v1), 2025-09-04
Supplement: Supplementary file 2 [file bfd7fb44afd353c71c05765e.docx]

**Table 2. Comparison of the characteristics and outcomes between Phase 1 and Phase 2**

| Variable | Phase 1 | Phase 2 | *p* value |
| --- | --- | --- | --- |
| Number of procedures | 12 | 41 | – |
| Gestational age, week | 38.2 (35.7–39.6) | 37.3 (34.2–39.3) | 0.647 |
| Birth weight, g | 2 813 (2 143–3 103) | 2 315 (1 860–2 924) | 0.202 |
| Postnatal age at procedure, day | 0 (0–2.8) | 0 (0–1.5) | 0.823 |
| Success rate of intragastric placement | 11 (92) | 41 (100) | 0.062 |
| Placement accuracy | 2 (17) | 34 (83) | < 0.001 |
| Placement error (Tumguide®), cm | 1.0 (0.0–1.0) | 0.0 (0.0–0.0) | 0.004 |
| Placement error (NEMU), cm | 0.3 (−1.3–1.4) | 0.5 (0.0–1.5) | 0.384 |
| Placement error (WBF), cm | 0.7 (0.1–1.3) | 0.9 (0.3–1.8) | 0.180 |
| Data are presented as *n* (%) or median (interquartile).  Successful placement is defined as the feeding tube’s side hole located distal to the gastroesophageal junction. Placement accuracy is defined as the proportion of cases not requiring post-placement adjustment. Placement error is defined as the difference between the method-determined insertion length and final adjusted length.  Abbreviations: NEMU, nose-earlobe-mid umbilicus; WBF, weight-based formula. | | | |
