# Supplementary material for: Efficacy and accuracy of the transillumination-guided gastric tube placement in neonates
Source: Research Square preprint supplement (doi:10.21203/rs.3.rs-7463340/v1), 2025-09-04
Supplement: Supplementary file 3 [file dcc6a06f73ccca46b2f852bb.docx]

**Table 1. Characteristics of subjects and outcomes**

| Variable | Value |
| --- | --- |
| Number of procedures | 53 |
| Male | 31 (58) |
| Gestational age, week, median | 37.4 (34.3–39.4) |
| Preterm infants | 23 (43) |
| Birth weight, g | 2 577 (1 998–2 965) |
| LBWI (1,500~2,499g) | 21 (40) |
| VLBWI (~1,499g) | 4 (8) |
| Postnatal age at procedure, days | 0 (0–2) |
| Success rate of intragastric placement | 52 (98) |
| Placement accuracy | 36 (68) |
| Any adverse events | 0 (0) |
| Placement error (Tumguide®), cm | 0.0 (0.0–0.0) |
| Placement error (NEMU), cm | 0.5 (−0.3–1.5) |
| Placement error (WBF), cm | 0.9 (0.2–1.6) |
| Data are presented as *n* (%) or median (interquartile).  Successful placement is defined as the feeding tube’s side hole located distal to the gastroesophageal junction. Placement accuracy is defined as the proportion of cases not requiring post-placement adjustment. Placement error is defined as the difference between the method-determined insertion length and final adjusted length.  Abbreviations: LBWI, low birth weight infant; VLBWI, very low birth weight infant; NEMU, nose-earlobe-mid umbilicus; WBF, weight-based formula. | |
