# Supplementary figures and images for: Efficacy and accuracy of the transillumination-guided gastric tube placement in neonates
Source: Research Square preprint supplement (doi:10.21203/rs.3.rs-7463340/v1), 2025-09-04

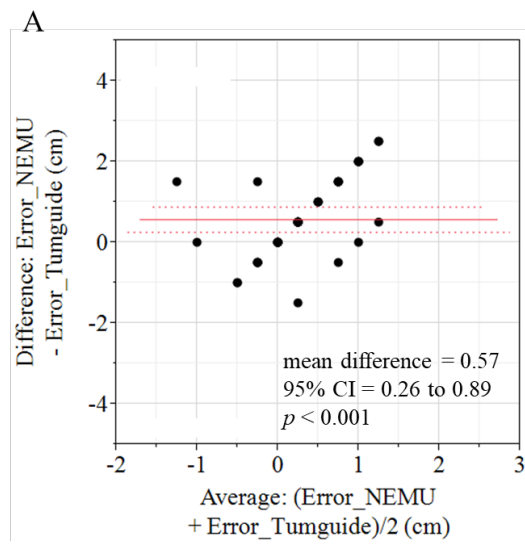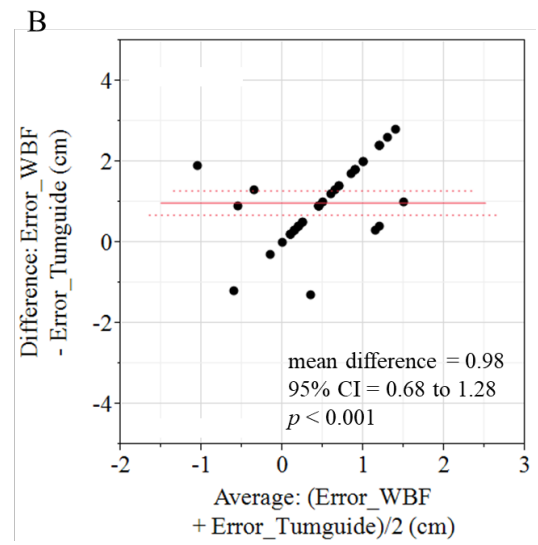

**Supplemental Figure 2.**

Supplement: Supplementary file 1 [file 0288b14a4d45d093ec7bca0f.pdf]

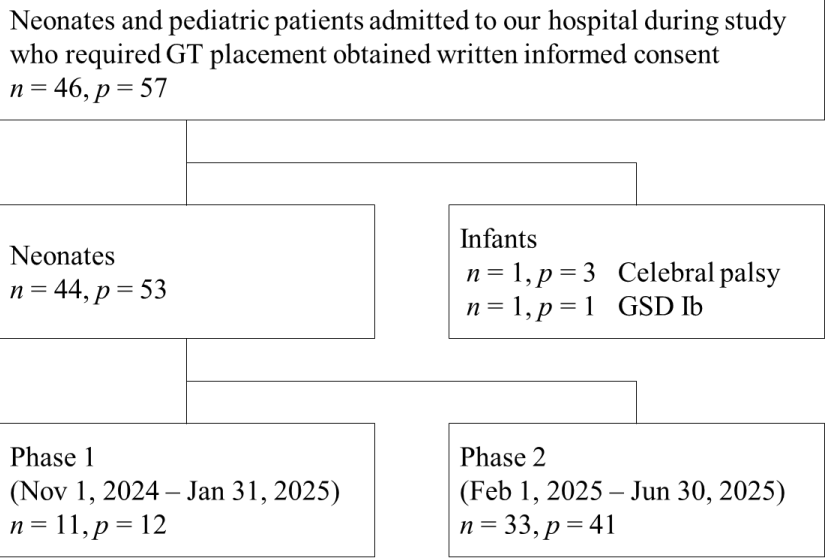

**Supplemental Figure 1.**

Supplement: Supplementary file 2 [file cc422069a2ffea58099851d1.pdf]
